# Supplementary material for: Genome-wide diversity and differentiation in New World populations of the human malaria parasite Plasmodium vivax
Source: PLOS journal article supplement (doi:10.1371/journal.pntd.0005824), 2017-07-31
Supplement: S1 (10.1371/journal.pntd.0005824.s001) [file journal.pntd.0005824.s001]

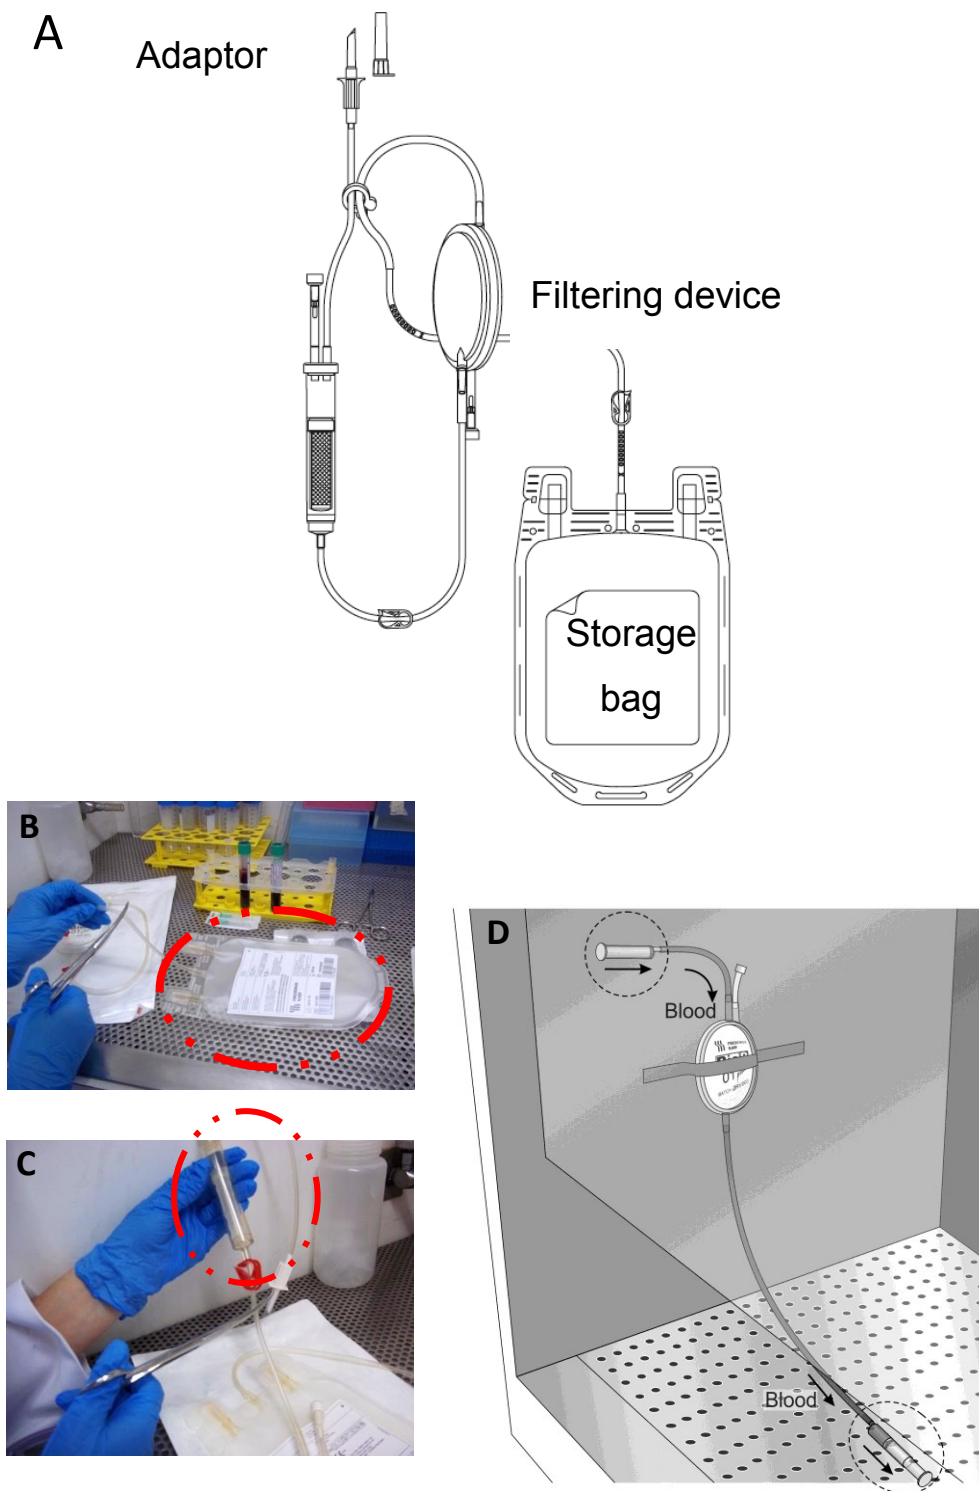

**S1 Fig. Single-step filtering procedure used to remove leukocytes from clinical blood samples in a field laboratory.** *A*, BioR 01 Plus leukocyte depletion filter (Fresenius Kabi, Bad Homburg, Germany). *B* and *C*, cutting off with a scissor, under sterile conditions, the tubing connecting the filtering device to the 400-ml blood storage bag and the adaptor. *D*, use of filtering device in a laminar flow hood, indicating how the blood sample is introduced and collected, with 10-ml syringes, after filtering.
